# Supplementary material for: Novel technology for the rapid total mineralization of carbon tetrachloride under ambient conditions
Source: Royal Society of Chemistry journal article supplement (doi:10.1039/c3ra44204g), 2013-01-01

## SUPPLEMENTARY INFORMATION

Figure 1: Detection of gas products by GC with TCD detector. First spectrum is a reference injection of oxygen with a pick at 2.6ppm. Second spectrum is a reference injection of Cl<sub>2</sub> with a pick at 3.7ppm. Third spectrum is the injection of gas phase end product of CTC destruction reaction.

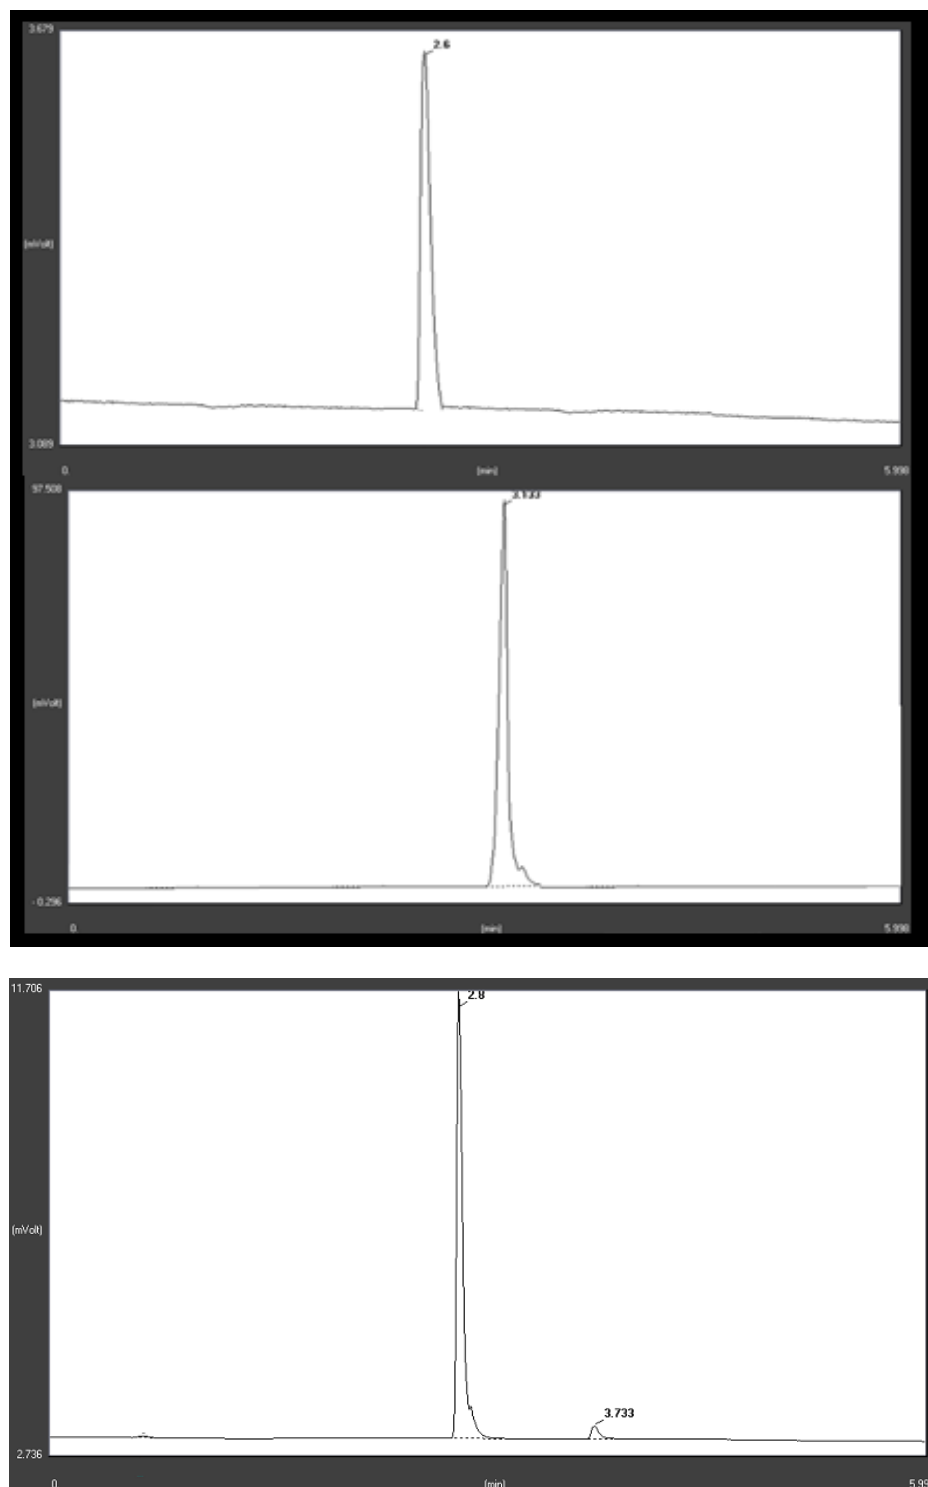

Figure 2: Detection of 1,2-dichlorobenzene by H-NMR. First spectrum is a reference of styrene. Second spectrum is a reaction end product. The spectrum clearly has shown mixed styrene and dichlorobenzene products. 1,2-dichlorobenzene can't be isolated.

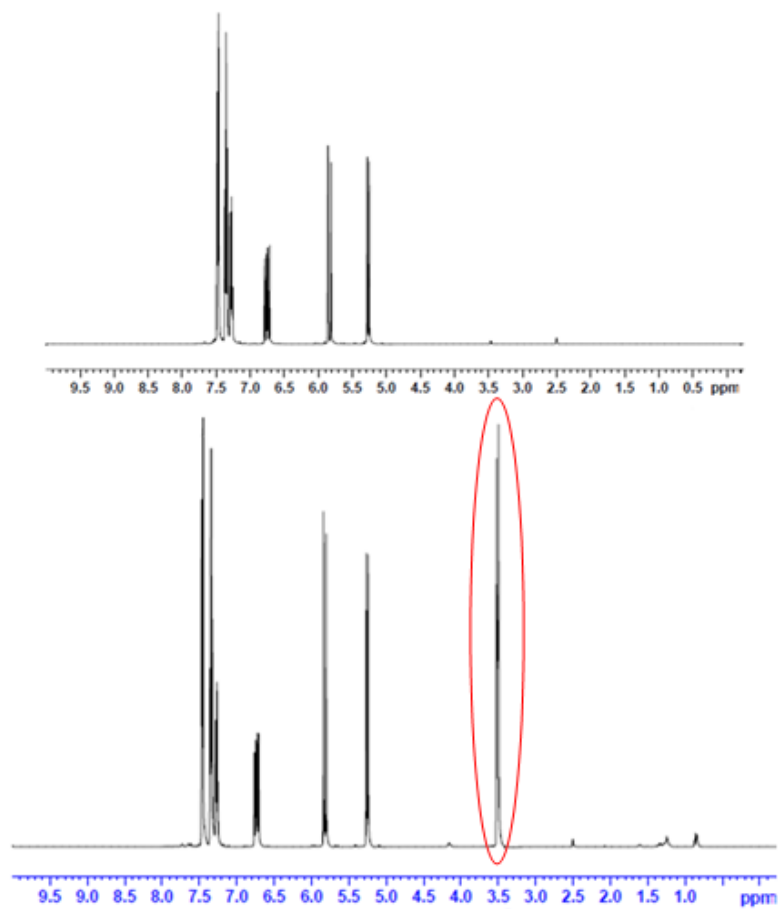

Supplement: c3ra44204g.pdf [file c3ra44204g.pdf]
